# Supplementary material for: Peptide-Modified Surfaces for Enzyme Immobilization
Source: PubMed Central journal article supplement (PMC3073003; doi:10.1371/journal.pone.0018692), 2011-04-08
Supplement: pone.0018692.s001.pdf [file pone.0018692.s001.pdf]

## SUPPORT INFORMATION

### **Peptide-Modified Surfaces for Enzyme Immobilization**

*Jinglin Fu<sup>1,2,3</sup>, Jeremy Reinhold<sup>1,3</sup> and Neal W. Woodbury<sup>1,3\*</sup>*

Center for Single Molecule Biophysics<sup>1</sup> and Center for Innovations in Medicine, the Biodesign Institute<sup>2</sup>, Department of Chemistry and Biochemistry, Arizona State University, Tempe, AZ 85287<sup>3</sup>

E-mail: [nwoodbury@asu.edu](mailto:nwoodbury@asu.edu)

\*Address correspondence to: Neal W. Woodbury, 1001 S. McAllister Avenue, Tempe, AZ 85287-5201. Phone: 480-965-6671, Fax: 480-727-0396

## SUPPLEMENTARY TABLES

**Table S1** Microarray data corresponding to the peptides selected for surface conjugation <sup>a</sup>.

| Peptide | Sequence             | pI   | Enzyme activity (Norm.) | Enzyme binding (Norm.) | Surface specific activity (Norm.) |
|---------|----------------------|------|-------------------------|------------------------|-----------------------------------|
| 1       | YHNNPGFRVMQQNKLHHGSC | 9.3  | 92.3                    | 37.8                   | 10.9                              |
| 2       | QYHHFMNLKRQGRAQAYGSC | 9.8  | 90.4                    | 42.4                   | 9.5                               |
| 3       | RVFKRYKRWLHVSRYFFGSC | 10.3 | 0.9                     | 50.3                   | 0.08                              |
| 4       | PASMFSYFKKQGYYYKLGSC | 9.4  | 2.3                     | 63.9                   | 0.16                              |
| 5       | EFSNPTAQVFPDFWMSDGSC | 3.5  | 0.7                     | 0.4                    | -                                 |

<sup>a</sup> Peptides 1 and 2 were selected to promote strong activity when bound to  $\beta$ -Gal. Peptides 3 and 4 bind to  $\beta$ -Gal but result in very low enzyme activity. Peptide 5 does not bind to  $\beta$ -Gal. Surface specific activity of  $\beta$ -Gal bound to each of the peptide spots was calculated by dividing the total bound enzyme activity by the total binding intensity. The detailed selection is described in reference [13].

**Table S2** Selected point variants that improve the binding affinity and activity of  $\beta$ -Gal on a microarray surface<sup>a</sup>.

|    | Sequence             | Binding     | Total activity | Surface Specific activity |
|----|----------------------|-------------|----------------|---------------------------|
| 1  | YHNNPGFRVMQQNKLHHGSC | 1.00        | 1.00           | 1.00                      |
| 2  | YHNSPGFRVMQQNKLHHGSC | 1.22 ± 0.15 | 1.89 ± 0.19    | 1.55                      |
| 3  | YHNNPGYRVMQQNKLHHGSC | 1.77 ± 0.14 | 3.15 ± 0.29    | 1.78                      |
| 4  | YHNNPGFYVMQQNKLHHGSC | 0.93 ± 0.20 | 1.55 ± 0.22    | 1.67                      |
| 5  | YHNNPGFRYMQQNKLHHGSC | 1.50 ± 0.12 | 4.25 ± 0.18    | 2.82                      |
| 6  | YHNNPGFRWMQQNKLHHGSC | 1.62 ± 0.13 | 2.83 ± 0.1     | 1.75                      |
| 7  | YHNNPGFRVYQQNKLHHGSC | 1.72 ± 0.15 | 3.04 ± 0.26    | 1.77                      |
| 8  | YHNNPGFRVMQQYKLHHGSC | 1.50 ± 0.21 | 2.52 ± 0.40    | 1.68                      |
| 9  | YHNNPGFRVMQQNKWHHGSC | 2.10 ± 0.15 | 3.29 ± 0.20    | 1.57                      |
| 10 | YHNSPGFRYMQQNKLHHGSC | 1.62 ± 0.16 | 3.53 ± 0.26    | 2.18                      |
| 11 | YHNNPGYRYMQQNKLHHGSC | 2.35 ± 0.22 | 6.01 ± 0.40    | 2.56                      |
| 12 | YHNNPGFYMQQNKLHHGSC  | 0.66 ± 0.11 | 0.91 ± 0.10    | 1.37                      |
| 13 | YHNNPGFRYMQQYKLHHGSC | 2.20 ± 0.20 | 4.78 ± 0.50    | 2.17                      |
| 14 | YHNNPGFRYMQQNKWHHGSC | 2.05 ± 0.26 | 5.72 ± 0.61    | 2.79                      |

<sup>a</sup> Peptide 1 is the YHNN lead; Peptides 2-9 are selected single-point variants of the YHNN lead; Peptides 10-14 are combinations of two single-point variants. The combinations of two selected single-point variants sometimes improve the affinity to  $\beta$ -Gal, but do little to enhance the specific activity of the bound enzyme. All binding and activity data is normalized to that of the YHNN lead.

**Table S3** Point variants that improve the thermal stability of bound  $\beta$ -Gal <sup>a</sup>.

| Sequence              | Binding (Norm.)<br>at 55 C | Specific activity (Norm.)<br>at 55 C |
|-----------------------|----------------------------|--------------------------------------|
| WHNNPGFRVMQQNKLHHGSC  | 1.28                       | 1.45                                 |
| YHSNPGFRVMQQNKLHHGSC  | 1.48                       | 1.42                                 |
| YHNNPGYRVMQQNKLHHGSC  | 1.77                       | 1.38                                 |
| YHNNPGWRVMQQNKLHHGSC  | 1.07                       | 1.35                                 |
| YHNNPGFRYMQQNKLHHGSC  | 1.5                        | 1.86                                 |
| YHNNPGFRVMQQNKL AHGSC | 0.89                       | 1.54                                 |
| YHNNPGFRVMQQV KLHHGSC | 1.67                       | 1.47                                 |

<sup>a</sup> All data is normalized to the YHNN lead.

**Table S4** Point variants that modulate the optimal pH range of bound  $\beta$ -Gal <sup>a</sup>.

| Sequence              | Specific activity<br>at pH 6 | Specific activity<br>at pH 7 | Specific activity<br>at pH 8 | Specific activity<br>at pH 9 |
|-----------------------|------------------------------|------------------------------|------------------------------|------------------------------|
| YHANPGFRVMQQNKLHHGSC  | 2.53                         | 1.37                         | 1.05                         | 2.71                         |
| YHNSPGFRVMQQNKLHHGSC  | 3.08                         | 1.58                         | 0.95                         | 3.30                         |
| YHNNPGYRVMQQNKLHHGSC  | 2.68                         | 1.58                         | 0.80                         | 3.46                         |
| YHNNPGWRVMQQNKLHHGSC  | 2.13                         | 1.82                         | 0.84                         | 3.70                         |
| YHNNPGFRYMQQNKLHHGSC  | 3.47                         | 1.99                         | 1.09                         | 3.39                         |
| YHNNPGFRSMQQNKLHHGSC  | 3.61                         | 1.47                         | 0.90                         | 3.29                         |
| YHNNPGFRVMAQNKLLHHGSC | 3.83                         | 1.33                         | 0.81                         | 3.31                         |
| YHNNPGFRVMNQNKLLHHGSC | 2.04                         | 1.34                         | 0.69                         | 1.89                         |
| YHNNPGFRVMQANKLHHGSC  | 4.08                         | 1.91                         | 1.35                         | 2.76                         |
| YHNNPGFRVMQNNKLHHGSC  | 3.27                         | 1.42                         | 1.11                         | 3.11                         |
| YHNNPGFRVMQAKLHHGSC   | 2.85                         | 1.53                         | 1.02                         | 2.55                         |
| YHNNPGFRVMQQNK NHGSC  | 2.85                         | 1.49                         | 1.53                         | 4.33                         |

<sup>a</sup> All data is normalized to the YHNN lead.

## SUPPLEMENTARY FIGURES

Figure S1

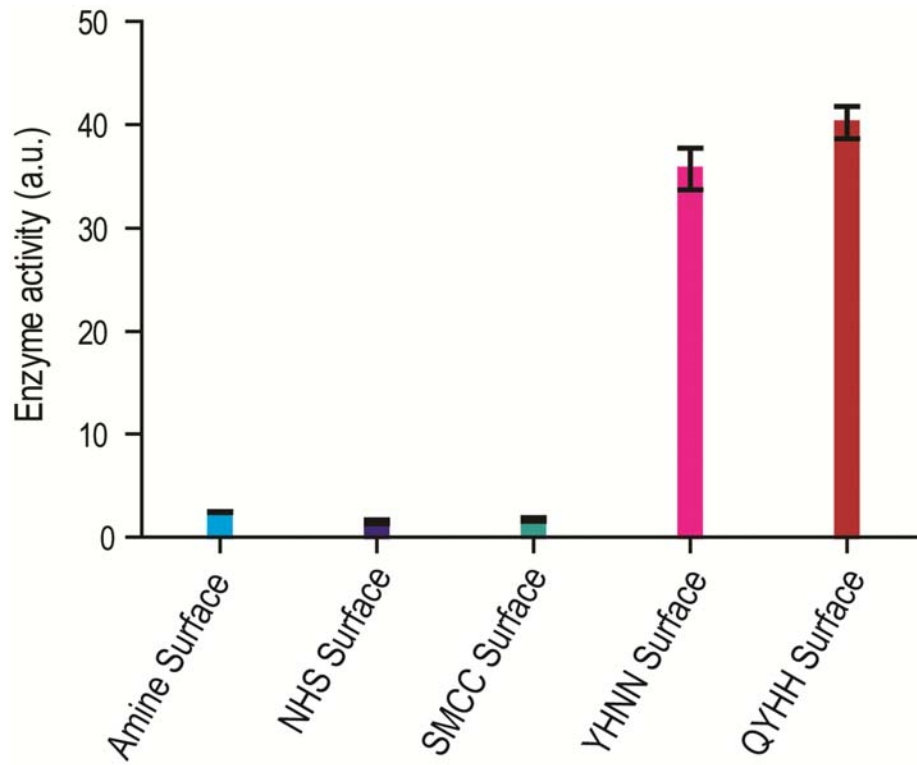

**Figure S1** Specificity of different types of surfaces for capturing  $\beta$ -Gal in a protein mixture. 25 nM  $\beta$ -Gal was mixed with 3 % BSA and then applied to these surfaces. The activity of each enzyme-bound surface was measured by adding 100  $\mu$ L of 100  $\mu$ M RBG into each microwell.

**Figure S2**

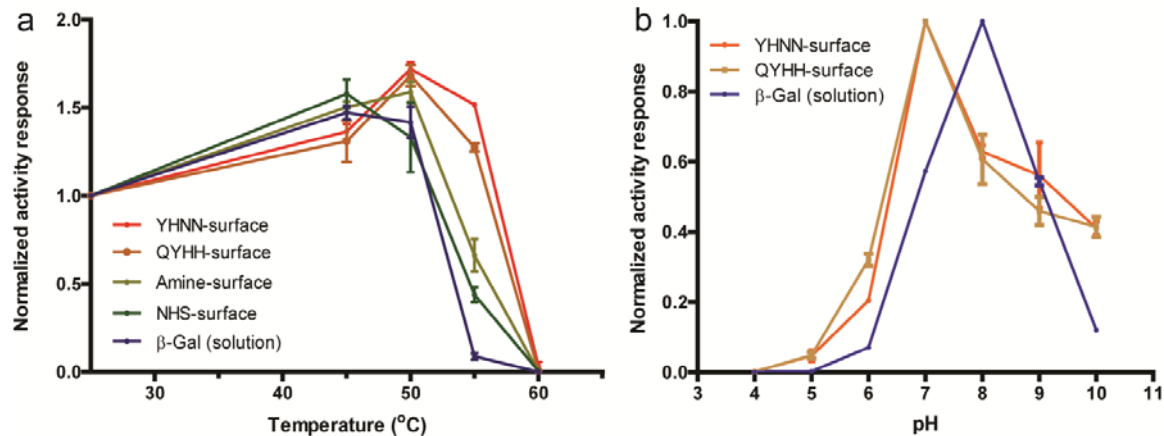

**Figure S2.** (a) Normalized thermal stability of immobilized  $\beta$ -Gal on different surfaces. The thermal stability of immobilized  $\beta$ -Gal was measured by incubating the enzyme at a specific temperature between 25 °C and 60 °C for one hour and then assaying its activity. Note that the activity of  $\beta$ -Gal after exposure to high temperature is substantially enhanced when bound to the YHNN and QYHH peptide-modified surfaces. The activities of  $\beta$ -Gal at different temperatures were normalized to that at 25°C. (b) Normalized activity of  $\beta$ -Gal immobilized on peptide-modified surfaces as a function of pH. The solution pH dependence of the activity is shown in dark blue for comparison. The activities of  $\beta$ -Gal at different pHs were normalized to the maximum activity at optimal pH.

Figure S3

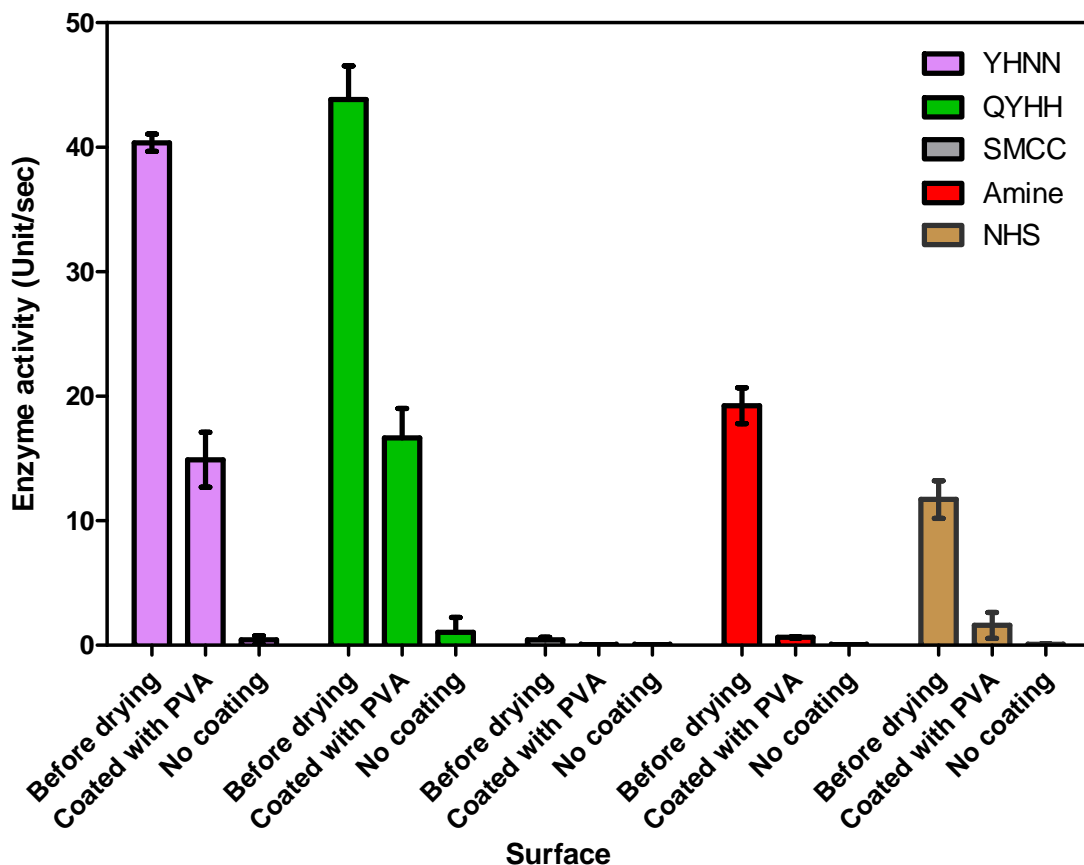

**Figure S3** Long-term stability of  $\beta$ -Gal immobilized on different surfaces. The long-term stability of the enzyme was tested in two ways. One method used was to coat the enzyme-bound microwell with PVA, dry it and then store it at room temperature in this condition for a week (the second column for each sample). The other method used was to dry the enzyme-bound microwell without PVA coating and store it at room temperature for a week (the third column for each sample). The remaining enzyme activity after storage is assayed by adding 100  $\mu$ L of 100  $\mu$ M RBG into each well. As shown in the figure, the peptide surfaces combined with PVA coating greatly maintain the enzyme activity after storage compared to the other surfaces.

**Figure S4**

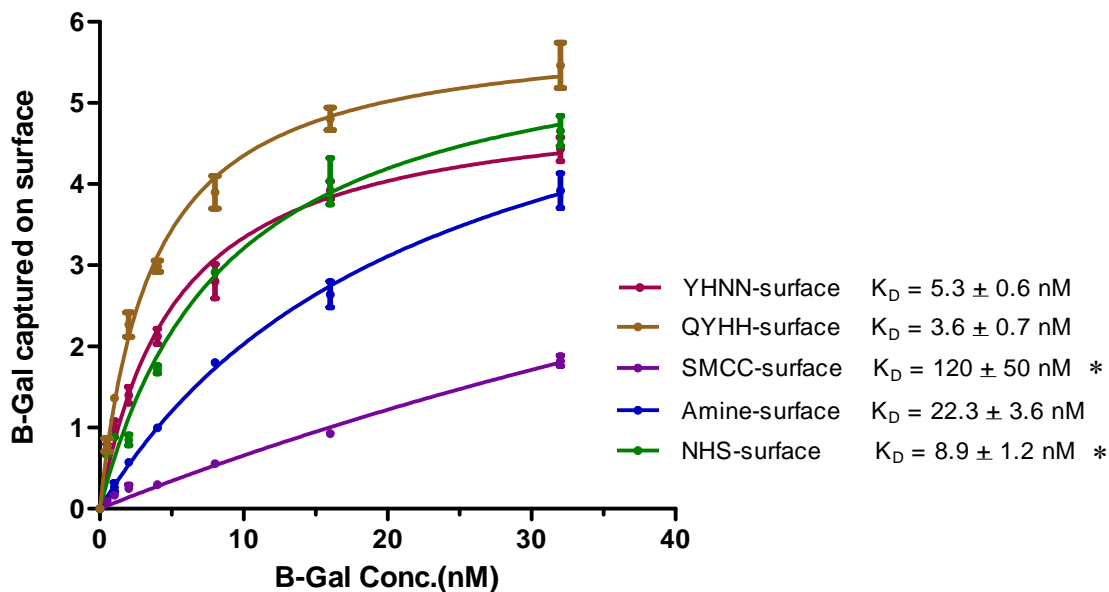

**Figure S4.** The apparent dissociation constants of different surfaces determined by ELISA. All data is fitted using the program GraphPad and the fitting equation:  $Y=B_{\max} * X / (K_d + X)$ , where  $B_{\max}$  is the theoretical maximum binding level of  $\beta$ -Gal. [\*] For the SMCC- and NHS-surfaces, there is no real  $K_D$  since this is a covalent conjugation with no dissociation equilibrium. In that case, the apparent  $K_D$  is calculated from curve fitting and likely reflects the saturation of enzyme attachment to the NHS-surface.



**Figure S5**

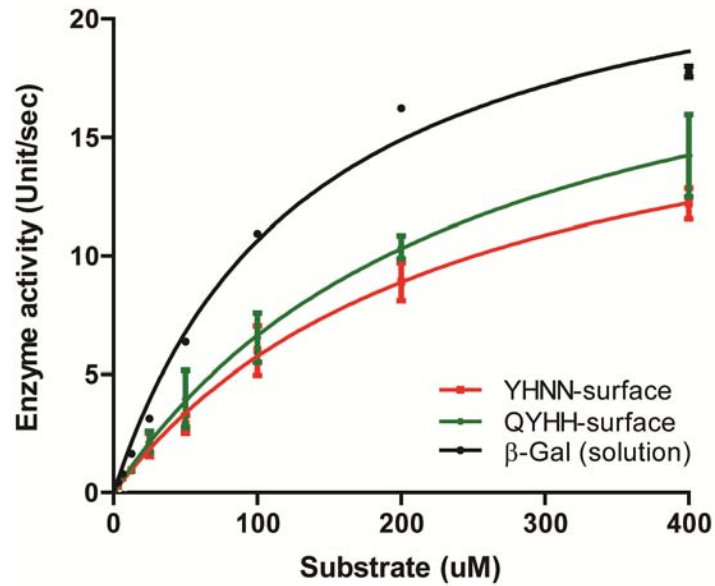

**Figure S5.** Colored curves: Curve fit determining the Michaelis constants of  $\beta$ -Gal immobilized on YHNN- and QYHH-modified beads using an amount of bound enzyme equivalent to a solution enzyme concentration of  $\sim 150$  pM. Black curve: Michaelis constants determined for the free enzyme at 150 pM. The enzyme activities are measured as a function of the concentration of the substrate RBG, between 3  $\mu\text{M}$  and 400  $\mu\text{M}$ , at 25  $^{\circ}\text{C}$ . All data is fitted using the program GraphPad and the fitting equation:  $Y = V_{\text{max}} * X / (K_m + X)$

**Figure S6**

**a**

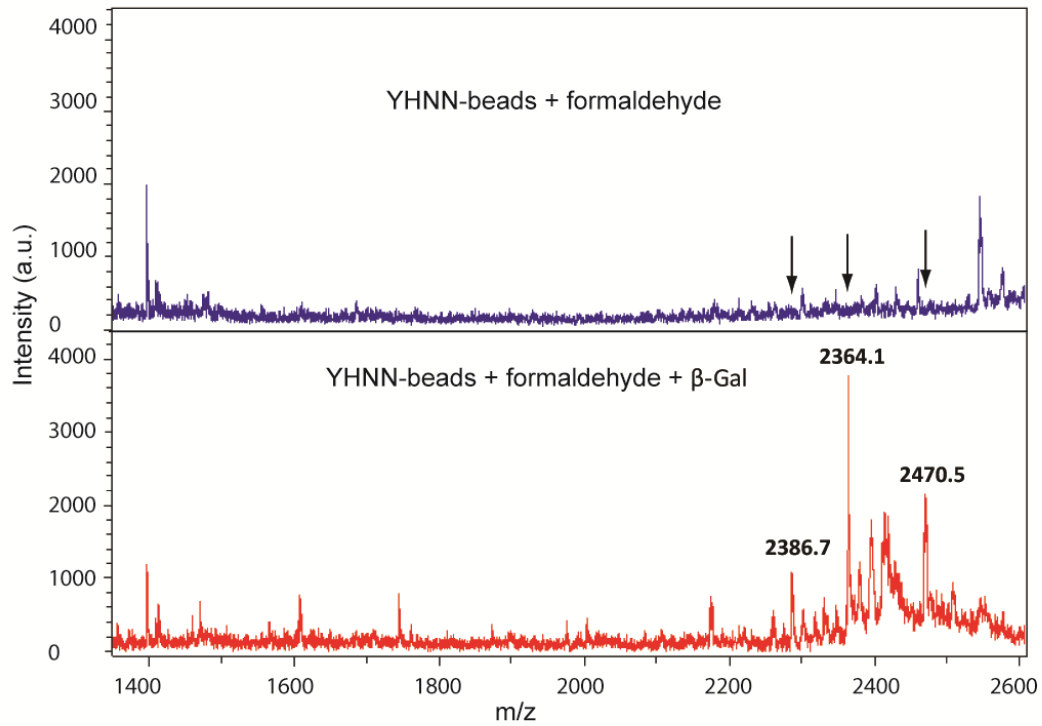

| Observed Mass (Da) | $\beta$ -Gal Fragment | Fragment Sequence    | Oxidation |
|--------------------|-----------------------|----------------------|-----------|
| 2260.2             | 430-447               | PRWLPAMSERVTRMVQRD   | 2         |
| 2286.7             | 470-487               | ALYRWIKSVDPSRPVQYE   | 5         |
| 2363.9             | 419-438               | GMVPMNRLTDDPRWLPAMSE | 3         |
| 2379.8             | 419-438               | GMVPMNRLTDDPRWLPAMSE | 4         |
| 2395.9             | 419-438               | GMVPMNRLTDDPRWLPAMSE | 5         |
| 2411.9             | 419-438               | GMVPMNRLTDDPRWLPAMSE | 6         |
| 2422.2             | 429-447               | DPRWLPAMSERVTRMVQRD  | 5         |
| 2370.5             | 429-447               | DPRWLPAMSERVTRMVQRD  | 8         |

**b**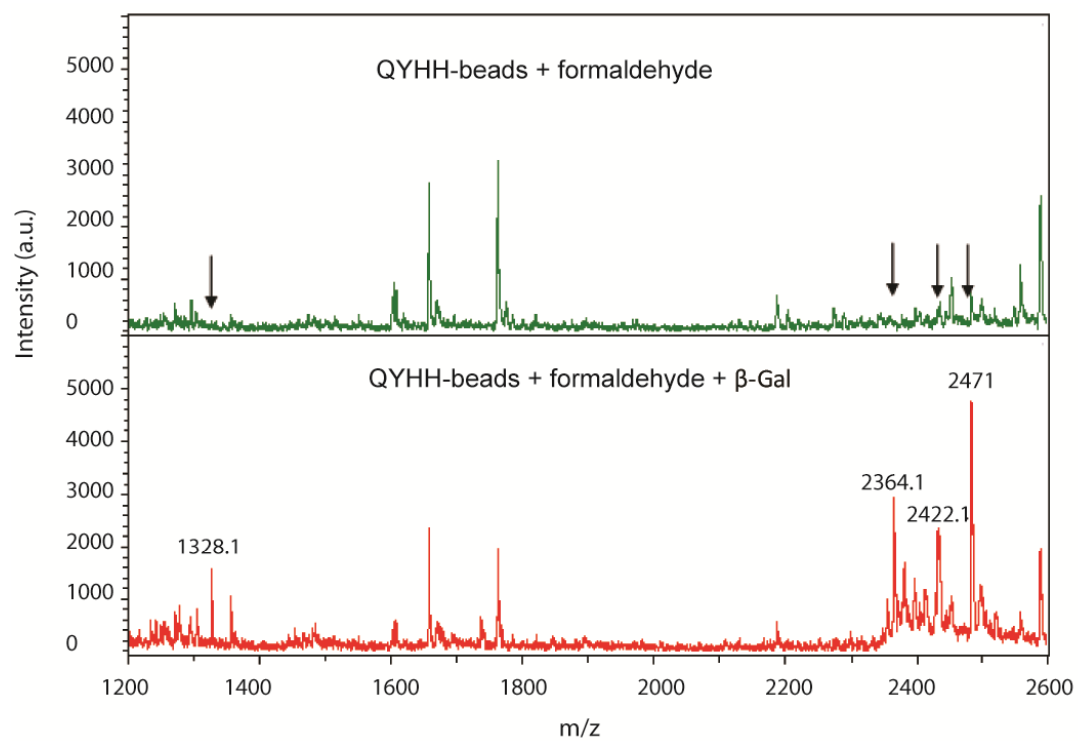

| Observed Mass (Da) | $\beta$ -Gal Fragment | Fragment Sequence    | Oxidation |
|--------------------|-----------------------|----------------------|-----------|
| 1328.2             | 419-429               | GMVPMNRLTDD          | 5         |
| 2355.6             | 430-447               | PRWLPAMSERVTRMVQRD   | 8         |
| 2364.1             | 419-438               | GMVPMNRLTDDPRWLPAMSE | 3         |
| 2380.4             | 419-438               | GMVPMNRLTDDPRWLPAMSE | 4         |
| 2396.5             | 419-438               | GMVPMNRLTDDPRWLPAMSE | 5         |
| 2412.6             | 419-438               | GMVPMNRLTDDPRWLPAMSE | 6         |
| 2422.1             | 429-447               | DPRWLPAMSERVTRMVQRD  | 5         |
| 2471               | 429-447               | DPRWLPAMSERVTRMVQRD  | 8         |

**Figure S6** MALDI-TOF analysis of  $\beta$ -Gal crosslinked to peptide-modified beads after Glu-c digestion. (a) The upper figure is a YHNN-bead blank control and the lower figure is  $\beta$ -Gal crosslinked to YHNN-beads. The protein fragment analysis indicates that the main binding region between the enzyme and the YHNN-beads is located near the amino acid residues 419-447 (bottom table). Many of the digest fragments observed are actually from the same stretch of amino acid sequence but have different different degrees of oxidation as a result of exposure to formaldehyde. (b) The upper figure is a QYHH-bead blank control and the lower figure is  $\beta$ -Gal crosslinked to QYHH-beads. The mapping data shows that the binding region of the peptide QYHH with  $\beta$ -Gal is near amino acid residues 419-447, just as was observed for the peptide YHNN. This region of  $\beta$ -Gal is located near the interface between two subunits of the protein.

**Figure S7**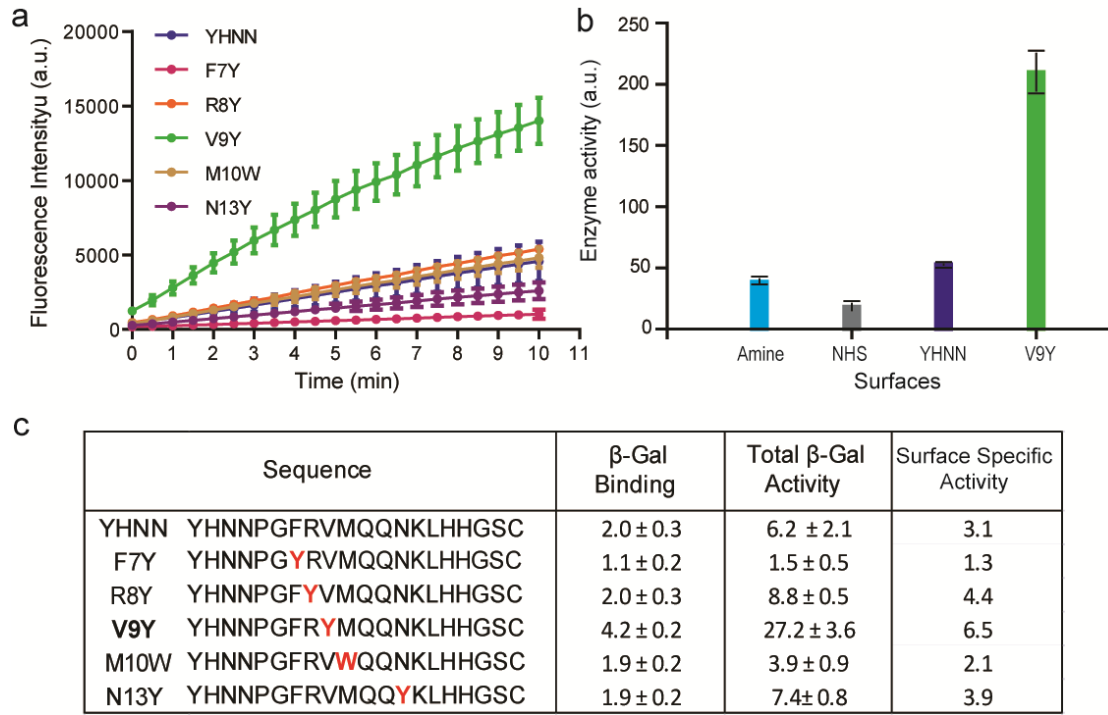

**Figure S7** Activity of  $\beta$ -Gal immobilized on different surfaces including ones in which the lead peptide, YHNN, was modified by point variants selected from microarray screening. (a) YHNN and 5 selected single-point variants were used to modify aminated microwell surfaces for capturing  $\beta$ -Gal. 3 variants, R8Y, V9Y and N13Y showed improvement of total bound enzyme activity. The variant V9Y demonstrated the best enzyme immobilization performance: a roughly 2-fold improvement both in surface affinity and relative specific activity of the bound enzyme, and nearly a 5-fold improvement in total activity of the bound enzyme. (b) Total enzyme activity immobilized on the YHNN- and V9Y-modified surfaces compared to amine and NHS surfaces. (c) Binding and activity of  $\beta$ -Gal immobilized on surfaces modified by peptides. The relative  $\beta$ -Gal binding amount is determined by measuring the activity of APase conjugated streptavidin bound to the biotinylated  $\beta$ -Gal. The enzyme activity is evaluated by adding 100  $\mu$ L of 100  $\mu$ M RBG into each microwell.

**Figure S8**

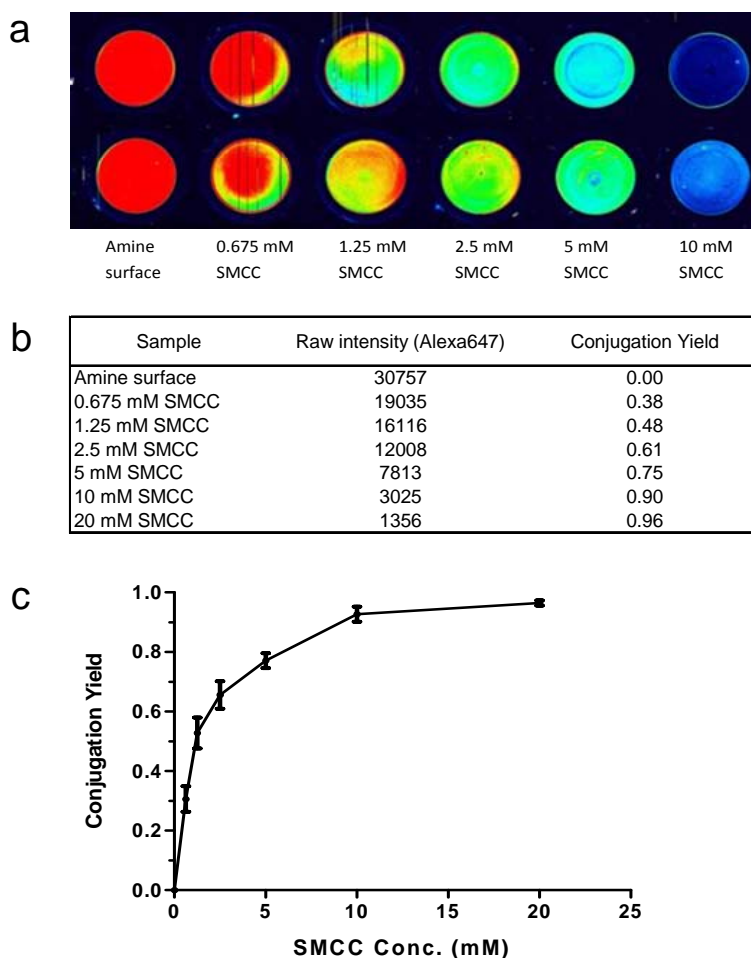

**Figure S8.** Optimization of SMCC conjugation: (a) raw fluorescence images of Alexa-647-labeled aminated microwells with SMCC capping at different concentrations. SMCC will conjugate to the amine groups on the microwells and prevent the labeling of Alexa-647 dye molecules. The higher the conjugation yield, the less the fluorescence from the labeled fluorophores; (b) Fluorescence intensities of Alexa-647-labeled microwells with different concentrations of SMCC capping; (c) surface conjugation yields of SMCC at different concentrations. The result shows that a 10 mM SMCC solution can be used to achieve a surface conjugation yield of more than 90%.

**Figure S9**

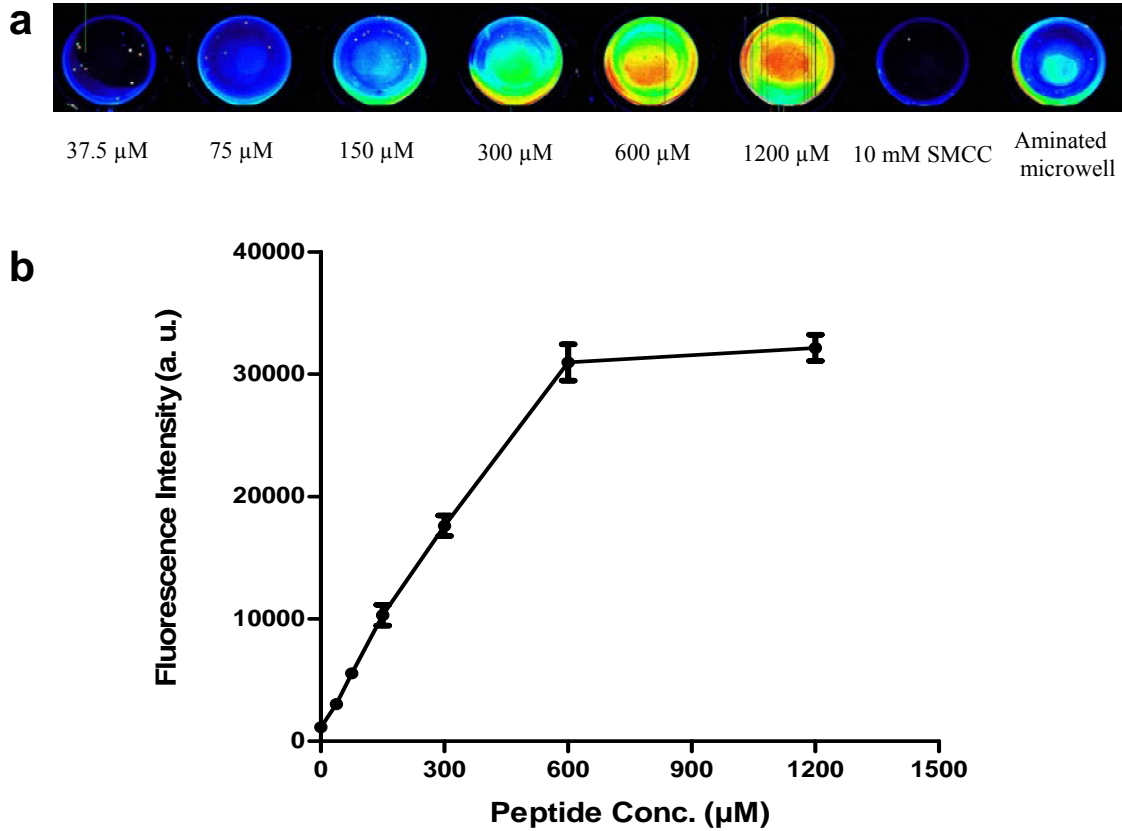

**Figure S9.** Optimization of peptide concentration for surface conjugation: (a) raw fluorescence images of Alexa-647-labeled microwells conjugated with different concentrations of peptide solution. 10 mM SMCC was first used to activate the aminated microwells, and then peptides were conjugated to SMCC-activated surfaces through specific reactions between the C-terminal cysteine and maleimide. Surface peptide densities were measured by labeling the microwells with amine-reactive Alexa 647. The more peptide on surface, the stronger the labeled fluorescence intensity due to the reaction between the dye and the peptide amine groups. (b) Surface fluorescence intensity as a function of peptide concentration used for conjugation. The peptide used is YHNN with a sequence of “YHNNPGFRVMQQNKLHHGSC”.

**Figure S10**

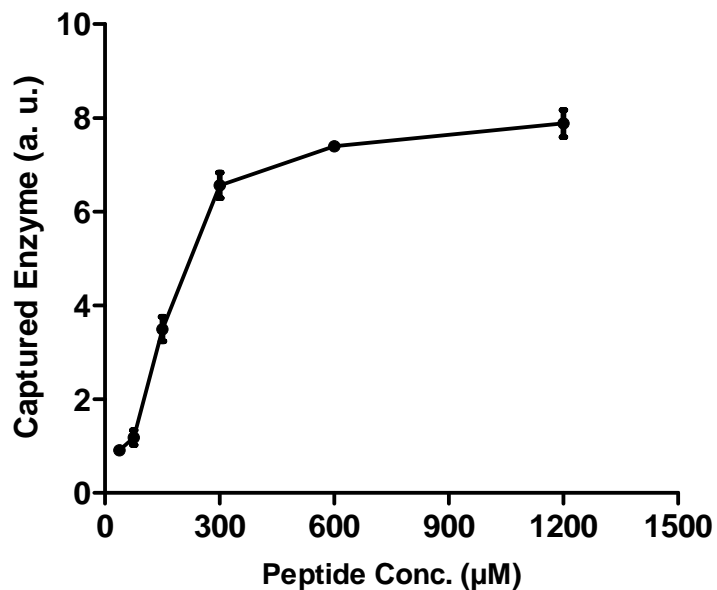

**Figure S10.** Optimization of peptide density for capturing  $\beta$ -Gal on peptide-modified microwells. Different densities of surface-immobilized peptide were created by varying the concentrations of peptide solution used for immobilization. The amount of immobilized  $\beta$ -Gal started to get saturation when surface was modified with 300  $\mu$ M or higher concentrations of peptide solution. The peptide used for optimization was YHNN.
